# Supplementary material for: Treatment Outcomes and Prognostic Factors of Acute Variceal Bleeding in Patients with Hepatocellular Carcinoma
Source: PubMed Central journal article supplement — Gut Liver. 2019 Dec 11;14(4):500–8. doi: 10.5009/gnl19155 (PMC7366146; doi:10.5009/gnl19155), 2019-12-11
Supplement: GNL-14-500_Supple.pdf [file GNL-14-500_Supple.pdf]

**Supplementary Table 1.** Independent Risk Factors for 5-Day Treatment Failure in All Patients with Acute Variceal Hemorrhage (n=329)

| Variable                                    | Univariate | Multivariate analysis |                      |
|---------------------------------------------|------------|-----------------------|----------------------|
|                                             | p-value    | p-value               | HR (95% CI)          |
| Age                                         | 0.052      | 0.006                 | 1.047 (1.013–1.082)  |
| Initial systolic blood pressure, <100 mm Hg | 0.067      |                       |                      |
| Heart rate <100/min                         | 0.056      |                       |                      |
| Active bleeding on initial endoscopy        | 0.001      | 0.032                 | 2.343 (1.074–5.115)  |
| Endoscopic hemostasis failure               | <0.001     | 0.003                 | 3.555 (1.518–8.326)  |
| PRBC transfusion                            | 0.039      |                       |                      |
| PPI use                                     | 0.034      |                       |                      |
| Antibiotics prophylaxis                     | 0.029      |                       |                      |
| MELD score                                  | <0.001     |                       |                      |
| Presence of HCC                             | 0.002      |                       |                      |
| Presence of PVT                             | <0.001     |                       |                      |
| Presence of ascites                         | 0.003      | 0.038                 | 3.615 (1.071–12.204) |
| Hepatic failure                             | <0.001     |                       |                      |
| Hepatorenal syndrome                        | <0.001     | 0.024                 | 3.228 (1.169–8.914)  |
| Hepatic encephalopathy                      | <0.001     |                       |                      |

HR, hazard ratio; CI, confidence interval; PRBC, packed red blood cell; PPI, proton pump inhibitor; MELD, Model for End-Stage Liver Disease; HCC, hepatocellular carcinoma; PVT, portal vein thrombosis.

**Supplementary Table 2.** Independent Risk Factors for 6-Week Mortality in All Patients with Acute Variceal Hemorrhage (n=329)

| Variable                                    | Univariate | Multivariate analysis |                      |
|---------------------------------------------|------------|-----------------------|----------------------|
|                                             | p-value    | p-value               | HR (95% CI)          |
| Age                                         | 0.059      | 0.011                 | 1.037 (1.008–1.066)  |
| Initial systolic blood pressure, <100 mm Hg | 0.001      | 0.009                 | 2.592 (1.264–5.315)  |
| Heart rate, <100/min                        | 0.007      |                       |                      |
| Varix size, ≥F2                             | 0.066      | 0.002                 | 3.833 (1.634–8.995)  |
| Active bleeding on initial endoscopy        | 0.001      |                       |                      |
| Endoscopic hemostasis failure               | <0.001     | <0.001                | 5.342 (2.422–11.785) |
| Alanine aminotransferase                    | 0.012      | 0.01                  | 1.002 (1.001–1.004)  |
| PPI use                                     | 0.007      |                       |                      |
| Antibiotic prophylaxis                      | 0.014      |                       |                      |
| MELD score                                  | <0.001     | 0.001                 | 1.111 (1.042–1.184)  |
| Presence of HCC                             | <0.001     | 0.001                 | 2.915 (1.506–5.642)  |
| Presence of ascites                         | 0.002      |                       |                      |
| Hepatic failure                             | <0.001     | 0.001                 | 3.038 (1.540–5.991)  |
| Hepatorenal syndrome                        | <0.001     |                       |                      |

HR, hazard ratio; CI, confidence interval; PPI, proton pump inhibitor; MELD, Model for End-Stage Liver Disease; HCC, hepatocellular carcinoma.
